1 **SARS-CoV-2 neutralizing human antibodies protect against lower respiratory tract disease in a**  
2 **hamster model**

3

4 Bart L. Haagmans<sup>1,\*</sup>, Danny Noack<sup>1</sup>, Nisreen M.A. Okba<sup>1</sup>, Wentao Li<sup>5</sup>, Chunyan Wang<sup>5</sup>, Theo

5 Bestebroer<sup>1</sup>, Rory de Vries<sup>1</sup>, Sander Herfst<sup>1</sup>, Dennis de Meulder<sup>1</sup>, Peter van Run<sup>1</sup>, Mart M.

6 Lamers<sup>1</sup>, Bart Rijnders<sup>2</sup>, Casper Rokx<sup>2</sup>, Frank van Kuppeveld<sup>5</sup>, Frank Grosveld<sup>3,4</sup>, Dubravka

7 Drabek<sup>3,4</sup>, Corine GeurtsvanKessel<sup>1</sup>, Marion Koopmans<sup>1</sup>, Berend Jan Bosch<sup>5</sup>, Thijs Kuiken<sup>1</sup> and

8 Barry Rockx<sup>1,\*</sup>

9

10 \* corresponding authors

11 <sup>1</sup>Department of Viroscience, Erasmus Medical Center, Rotterdam, the Netherlands.

12 <sup>2</sup>Department of Medical Microbiology & Infectious Diseases, Erasmus Medical Center,

13 Rotterdam, the Netherlands.

14 <sup>3</sup>Department of Cell Biology, Erasmus Medical Center, Rotterdam, the Netherlands.

15 <sup>4</sup>Harbour BioMed, Rotterdam, the Netherlands.

16 <sup>5</sup>Virology Section, Infectious Diseases and Immunology Division, Department of Biomolecular

17 Health Sciences, Faculty of Veterinary Medicine, Utrecht University, Utrecht, the Netherlands.

18 **ABSTRACT**

19 Effective clinical intervention strategies for COVID-19 are urgently needed. Although several  
20 clinical trials have evaluated the use of convalescent plasma containing virus-neutralizing  
21 antibodies, the effectiveness has not been proven. We show that hamsters treated with a high  
22 dose of human convalescent plasma or a monoclonal antibody were protected against weight  
23 loss showing reduced pneumonia and pulmonary virus replication compared to control animals.  
24 However, a ten-fold lower dose of convalescent plasma showed no protective effect. Thus,  
25 variable and relatively low levels of virus neutralizing antibodies in convalescent plasma may  
26 limit their use for effective antiviral therapy, favouring concentrated, purified (monoclonal)  
27 antibodies.

28

29 **INTRODUCTION**

30 On 31 December 2019, the World Health Organization (WHO) was informed of a cluster of  
31 cases of pneumonia of unknown cause in Wuhan City, Hubei Province of China <sup>1</sup>. Subsequently  
32 a novel coronavirus (SARS-CoV-2), was identified and as of August 11<sup>th</sup>, WHO reported more  
33 than 20 million cases of SARS-CoV-2 infection worldwide, with over 700,000 deaths.

34 SARS-CoV-2 infection is characterized by a range of symptoms, including fever, cough, dyspnea  
35 and myalgia <sup>2</sup>. In severe cases, SARS-CoV-2 infection can be complicated by acute respiratory  
36 distress syndrome leading to respiratory insufficiency and multi-organ failure <sup>3</sup>.

37 An effective treatment is a high priority as SARS-CoV-2 continues to circulate in many regions,  
38 and there is a risk of additional future waves of infection. To date, WHO reported at least 166  
39 vaccine candidates being in different stages of development while other efforts include the  
40 development of neutralizing antibodies for prevention and/or treatment of SARS-CoV-2  
41 infection. Early during the outbreak, the usefulness of convalescent plasma transfusion was  
42 considered for treatment of severe cases <sup>4</sup>. Several large clinical trials have now been initiated  
43 to evaluate the efficacy and safety of convalescent plasma treatment of SARS-CoV-2 patients <sup>5</sup>.  
44 Data on the outcomes of these trials have been limited and to date, preliminary results from  
45 only a few small cohorts and one randomized clinical trial have been published. Results from a  
46 randomized clinical trial did not show a benefit <sup>6,7</sup>, while results from the small cohorts  
47 suggested clinical benefit but lacked controls for proper interpretation<sup>8-11</sup>. Although preclinical  
48 research indicated a limited protective effect of hamster serum when given to hamsters  
49 infected with SARS-CoV-2 early in the disease course <sup>12,13</sup>, effects of human plasma have not  
50 been analyzed in this animal model. Importantly, data on the level of neutralizing antibodies  
51 that are required to provide a clinically meaningful protective effect are not available.

52 Apart from convalescent plasma, different human monoclonal antibodies (MAb) against SARS-  
53 CoV-2 have been identified and characterized, for prophylactic and therapeutic use. Most of  
54 these studies have shown efficient neutralization of SARS-CoV-2 *in vitro*, but few antibodies  
55 have been evaluated for their efficacy *in vivo*. We previously determined that MAb 47D11  
56 efficiently neutralizes both SARS-CoV and SARS-CoV-2 *in vitro* <sup>14</sup>. In the present study, we used  
57 this MAb and two doses of human convalescent plasma, differing almost ten-fold in neutralizing

- 58 antibody concentration, to evaluate the efficacy of prophylactic antibody treatment in a
- 59 hamster model of moderate to severe SARS-CoV-2 pneumonia.

## 60 RESULTS

### 61 *Characteristics of neutralizing antibodies*

62 We pooled 6 convalescent plasma samples from PCR-confirmed COVID-19 patients. The  
63 samples were selected based on a minimum neutralizing antibody titer of 1:1280 (PRNT<sub>50</sub>;  
64 **Supplementary Table 1**). The neutralizing antibody titer of the pooled plasma as well as the  
65 diluted pooled plasma were determined to be 1:2560 and 1:320 respectively (**Supplementary**  
66 **Table 1**). Only ten of 115 convalescent plasma donors previously tested had a titer of 1:2560 or  
67 higher while the 1:320 titer of the diluted plasma was just above the median titer of 1:160 of all  
68 donors tested <sup>7</sup>.

69

70 In addition, we used human MAb 47D11 directed against SARS-CoV, which cross-reacts with  
71 SARS-CoV-2 and targets a conserved epitope in the S1 domain, previously shown to neutralize  
72 SARS-CoV-2 with an IC<sub>50</sub> of 0.57 µg/ml <sup>14</sup>. At a concentration of 3mg/mL the human MAb 47D11  
73 preparation had an equivalent neutralizing antibody titer of 1:5260.

74

### 75 *Neutralizing antibodies protect against body weight loss from SARS-CoV-2 infection*

76 To date, the Syrian golden hamster is the only animal species in which experimental SARS-CoV-  
77 2 infection results in moderate to severe pneumonia, with clinical signs, as well as shedding of  
78 virus <sup>12,13,15</sup>. Therefore, the prophylactic potential of the 47D11 MAb and convalescent human  
79 plasma was evaluated in this hamster model. Twenty-four hours prior to challenge with SARS-

80 CoV-2, animals were treated with MAb 47D11 or human convalescent plasma from COVID-19  
81 patients. Volumes of human plasma treatment were chosen to mimic the application in  
82 humans. Animals were treated via intraperitoneal administration with either 3 mg MAb in 1mL  
83 (equivalent of a PRNT<sub>50</sub> of 1:5260) or 500 µl human convalescent plasma (comparable to 300mL  
84 of convalescent plasma treatment in an adult human) containing either high (PRNT<sub>50</sub> 1:2560) or  
85 median (PRNT<sub>50</sub> 1:320) levels of SARS-CoV-2 neutralizing antibodies. Therefore, animals treated  
86 with human convalescent plasma were given a 4x or 40x lower dose of neutralizing antibodies  
87 compared to MAb 47D11, respectively. Unfortunately, due to technical restrictions blood could  
88 not be obtained on day 0 to determine the circulating neutralizing antibody titer. However,  
89 with a mean total blood volume in hamsters of 7,8 mL, we assumed that administration of  
90 MAb, and human convalescent plasma with high or median levels of neutralizing antibodies,  
91 lead to circulating neutralizing antibody titers of approximately 1:67, 1:16 and 1:2 respectively.  
92 There were three control groups, consisting of hamsters that were not treated prior to SARS-  
93 CoV-2 inoculation, and hamsters that were treated either with an irrelevant isotype control  
94 MAb or with normal healthy human plasma (not containing neutralizing antibodies to SARS-  
95 CoV-2; **Supplementary Table 1**) 24 hr before SARS-CoV-2 inoculation.

96

97 In line with earlier studies<sup>12,13</sup>, experimental SARS-CoV-2 infection via the intranasal route  
98 resulted in a transient but significant weight loss in untreated animals as early as 3 days post  
99 inoculation (p.i.), approaching 20% weight loss by day 5 p.i. and normalizing by day 10 p.i.  
100 (**Figure 1A**). No other clinical signs were observed. Treatment with MAb 47D11 or a high dose

101 of convalescent plasma protected animals against significant weight loss (**Figure 1A**). In  
102 contrast, treatment with the diluted convalescent plasma, control plasma, or control MAb did  
103 not protect against significant weight loss, with animals approaching 20% weight loss by day 5  
104 p.i..

105

#### 106 *Minimal effect of antibody treatment on SARS-CoV-2 shedding*

107 SARS-CoV-2 inoculation of hamsters resulted in detection of viral RNA in throat swabs from all  
108 groups for up to 10 days p.i., with peak shedding on day 2 p.i. (**Figure 1B**). In addition, viral RNA  
109 was detected in nasal washes for up to 10 days p.i. (**Figure 1C**). While animals were protected  
110 against weight loss following treatment with either MAb 47D11 or high dose convalescent  
111 plasma, no significant reduction of viral RNA in throat swabs or nasal washes was observed.  
112 Despite high levels of viral RNA in nasal washes for several days p.i., infectious virus could only  
113 be isolated on day 2 p.i. (**Figure 1D**). Interestingly, while no significant effect of treatment was  
114 found on viral RNA detection, both treatment with MAb 47D11 and high dose convalescent  
115 plasma resulted in significant reduction of 1-2 logs in infectious virus on day 2 p.i. ( $p < 0.05$ ,  
116 ANOVA; **Figure 1D**).

117 Low levels of viral RNA were detected in rectal swabs on day 2 p.i. and occasionally at very low  
118 levels on other days in individual animals. There was no significant difference in virus detection  
119 in rectal swabs between treated and control groups and no infectious virus was detected.

120

121 *Antibody treatment reduced SARS-CoV-2 replication in the lower respiratory tract*

122 Virus replication in the lungs and nasal turbinates was examined on day 4 p.i. (**Figure 1E-H**). In  
123 the lungs, treatment with MAb 47D11 or plasma with high neutralizing antibodies resulted in  
124 significant reduction of viral loads (both viral RNA,  $p < 0.01$  and infectious virus,  $p < 0.05$ , ANOVA)  
125 (**Figure 1E and F**). In contrast, these treatments did not result in a significant reduction of viral  
126 load in the nasal turbinates (**Figure 1G and H**).

127

128 *Antibody treatment reduces histopathological changes in the respiratory tract following SARS-*  
129 *CoV-2 infection*

130 At autopsy on day 4 p.i., control treated hamsters had single or multiple foci of pulmonary  
131 consolidation, visible as well-delimited, dark red areas, and covering 50-90% of the lung surface  
132 (**Figure 2**). No gross lesions were observed in any of the animals treated with either MAb 47D11  
133 or high dose of convalescent plasma. Lungs from animals treated with the diluted plasma, or  
134 control plasma/ control MAb showed similar lesions to untreated animals.

135

136 All animals, including the MAb 47D11 and high dose convalescent plasma groups, showed acute  
137 necrotizing and seropurulent rhinitis in the nasal cavity (**Figure 3**). It was centered on the  
138 olfactory mucosa, where it was marked and locally extensive. There, it was characterized by  
139 edema in the lumen mixed with sloughed epithelial cells, neutrophils, and cell debris, and by  
140 the presence of a moderate number of neutrophils in the epithelium and underlying lamina



141 propria. Many cells in the olfactory epithelium in all animals expressed SARS-CoV-2 antigen, as  
142 demonstrated by immunohistochemistry. The inflammation in the mucosa and respiratory  
143 mucosa of the nasal cavity was mild and multifocal, and a few undifferentiated epithelial cells  
144 and ciliated columnar respiratory epithelial cells expressed virus antigen but did not differ  
145 between treated and untreated animals inoculated with SARS-CoV-2.

146 The main observation in the lungs of the non-treated animals and the animals treated with  
147 diluted convalescent plasma, control plasma, or control MAb was multifocal or coalescing  
148 diffuse alveolar damage, which was characterized by loss of histological architecture of the lung  
149 parenchyma, edema, fibrin, sloughed epithelial cells, cell debris, neutrophils, mononuclear cells,  
150 and erythrocytes (**Extended Data Figure 1**). By immunohistochemistry, many type I  
151 pneumocytes and fewer type II pneumocytes at the edges of the lesions expressed virus  
152 antigen. Besides diffuse alveolar damage, there also was mild multifocal necrotizing and  
153 purulent bronchiolitis, characterized by loss of bronchiolar epithelium and the presence of a  
154 few neutrophils in the bronchiolar walls and lumina. By immunohistochemistry, a few  
155 bronchiolar epithelial cells expressed virus antigen.

156 Treatment with the 47D11 MAb resulted in a significant reduction of inflammation in the lungs  
157 ( $p < 0.01$ , ANOVA; **Figure 4 and 5A**) and viral antigen expression in the lungs ( $p < 0.05$ , ANOVA;  
158 **Figure 4 and 5B**). Although a reduction in inflammation and viral antigen was observed in the  
159 lungs of animals treated with high dose convalescent plasma, this was not statistically  
160 significant.

161 Following SARS-CoV-2 inoculation, all animals seroconverted by day 22 regardless of the  
162 treatment regimen (**Supplementary Table 2**). There was no significant difference in SARS-CoV-2  
163 specific IgG titers among treatment groups with IgG titers of 1:12.800.

164

## 165 **DISCUSSION**

166 Several studies have identified and characterized neutralizing antibodies against SARS-CoV-2 as  
167 a potential component of protective immunity<sup>14,16-22</sup>. However, to date, only very few studies  
168 have focused on evaluating the efficacy of antibodies to protect or prevent against SARS-CoV-2  
169 infection or disease *in vivo*. Those studies focused mainly on clinical signs and infection in the  
170 lungs and demonstrated mixed results with reduction in virus replication but no protection  
171 against pulmonary lesions<sup>13,16</sup>, complicating the interpretation of data.

172 This study shows that prophylactic treatment with neutralizing antibodies prevents SARS-CoV-2  
173 induced pneumonia in a hamster model. Animals treated with a high dose of neutralizing  
174 antibodies were protected against significant weight loss, did not show any gross lesions in  
175 their lungs and treatment resulted in a very substantial reduction in lung inflammation and  
176 virus replication in the lungs.

177 In agreement with recent studies, we show that prophylactic treatment with neutralizing  
178 antibodies can protect against disease following SARS-CoV-2 infection<sup>12,13</sup>. While hamsters  
179 infected with SARS-CoV-2 showed no overt respiratory signs, they lose significant weight similar  
180 to what has been reported previously<sup>13,15</sup>. Animals treated with high titers of neutralizing

181 antibodies were protected against significant weight loss, did not show any gross lung lesions  
182 and had significantly less histological lesions and associated virus antigen expression in the  
183 lungs. Previous studies using convalescent hamster serum and a MAb showed that prophylactic  
184 treatment decreased virus replication in lungs similar to our findings, however the hamster  
185 serum did not protect against lung pathology<sup>12,13,15</sup>. This is likely due to the fact that a lower  
186 dose of neutralizing antibodies was used (1:427) than was efficacious in this study (1 ml of MAb  
187 with titer 1:5260, or 0.5 ml of convalescent plasma with titer 1:2560).

188 Using convalescent plasma with lower neutralizing antibody titers (0.5 ml of convalescent  
189 plasma with titer 1:320), but still comparable to the median neutralizing titer found in patients  
190 recovered from COVID-19<sup>7</sup>, the protective efficacy was completely annulled. From our study  
191 the minimal protective neutralizing antibody titer in 0,5mL human plasma is between 1:320 and  
192 1:2560. However, extrapolation to the human setting should be done with caution and studies  
193 on the levels and kinetics of neutralizing antibodies observed in humans after treatment with  
194 convalescent plasma are needed. In the current study we inoculated animals with a high dose  
195 of virus and by a method that, despite intranasal inoculation, ensures delivery of virus in the  
196 lower respiratory tract. While this results in a robust model of SARS-CoV-2 pneumonia, humans  
197 will most likely be exposed to a much lower level of virus. Nevertheless, these data highlight the  
198 importance of pre-screening convalescent plasma from donors prior to use for convalescent  
199 plasma treatment. Indeed, levels of neutralizing antibodies vary substantially between  
200 individuals with a recent study showing a median titer of 1:160 in convalescent plasma in 115  
201 donors and 22% had a titer of 1:40 or lower<sup>7</sup>. The lower titers are more typically observed after  
202 mild or asymptomatic COVID-19 cases<sup>23</sup>; those that actually act as plasma donor.

203 While prophylactic treatment resulted in protection against disease and reduced SARS-CoV-2  
204 replication in the lungs, only a limited effect was found in the upper respiratory tract. Previous  
205 studies with influenza virus have shown that serum IgG can diffuse into alveolar lining fluid,  
206 thus protecting the lung parenchyma against virus infection <sup>24</sup>. In contrast, the concentration of  
207 IgG on the surface of nasal mucosa is much lower. This suggests that treatment may protect  
208 against disease in the lungs but not virus transmission from the nose. Recent studies have  
209 shown that SARS-CoV-2 can transmit between animals via both direct contact and air <sup>13,15,25</sup>.  
210 Similar to our study, infectious virus was only detected in nasal washes early during infection  
211 and the period in which virus could be transmitted to naïve animals correlated with the  
212 presence of infectious virus <sup>15</sup>. All animals treated with the MAb and convalescent plasma  
213 seroconverted, therefore, antibody based prevention of COVID-19 did not seem to prevent the  
214 development of humoral immunity after SARS-COV-2 exposure.

215 To date, the efficacy of prophylactic antibody treatment has not been evaluated in humans.  
216 Several studies have reported on the possible efficacy and safety of therapeutic treatment with  
217 convalescent plasma in both small cohorts as well as a clinical trial, with variable and  
218 inconclusive results <sup>6,9-11</sup>. The main results from the small cohorts suggest a clinical benefit and  
219 reduced virus loads; however, given the limited information and lack of controls, interpretation  
220 of the data is inconclusive. Recently, two randomized clinical trials were prematurely  
221 terminated and did not result in a shorter time to clinical improvement <sup>6,7</sup>. The effect of  
222 treatment may be limited due to use of convalescent plasma with low levels of neutralizing  
223 antibodies of at least 1:40 to 1:80. Given the dilution factor upon intravenous administration,  
224 this would effectively result in neutralizing antibody titers of ~1:2 or 1:4, respectively.

225 Unfortunately, in the current study, we were not able collect blood at the time of virus  
226 challenge. Furthermore, a recent study showed that most COVID-19 patients already have  
227 neutralizing antibody titers of 1:60 or higher at hospital admission <sup>7</sup>, supporting our findings  
228 that only treatment with high levels of neutralizing antibodies may have a protective effect. In  
229 addition, in most studies, only severe cases of SARS-CoV-2 infection were included at the time  
230 when patients were admitted to a hospital for severe disease. At that time, the therapeutic  
231 window for antibody treatment may have passed since many patients with severe disease are  
232 already resolving the virus infection in the lung while the observed severe disease is primarily  
233 due to an aberrant host response rather than virus infection. Hence for effective treatment, the  
234 timing and dosing of administered neutralizing antibodies is likely critical.

235 Despite being promising for prevention and treatment of COVID-19 infection, the use of  
236 hyperimmune globulin preparations from recovered patients has its inherent challenges,  
237 including safety, batch-to-batch variation, scalability, standardized dosing and presence of non-  
238 neutralizing antibodies. In addition, the potential for antibody dependent enhancement (ADE)  
239 of disease remains a concern in the development of vaccines and antibody treatments <sup>26</sup>.  
240 Experimental studies have previously shown that antibodies against SARS-CoV can induce  
241 severe lung injury <sup>27</sup>. In the current study we did observe increased levels of infectious virus in  
242 the nasal washes of some individual animals treated with lower levels of neutralizing  
243 antibodies, but not significant due to the variation in infectious titers between animals, and was  
244 also not supported by significant difference in disease or histopathology. Given that we cannot  
245 reliably predict ADE of disease after antibody treatment or vaccination, it will be crucial to  
246 evaluate safety in humans as convalescent plasma treatments continue. These challenges are

247 more easily addressed by using purified and concentrated plasma derived antibodies or  
248 (combinations) of recombinantly produced MAbs. MAbs with desired properties can be  
249 selected from the immune repertoire of e.g. infected or immunized individuals with respect to  
250 binding affinity, potency and breadth of neutralization. Moreover, antibody engineering allows  
251 to tweak the Fc-mediated immune effector functions and to improve MAb pharmacokinetics  
252 and reduce potential disease enhancing effects. In addition, established manufacturing  
253 pipelines allow efficient, highly controlled and scalable production. Success with single or  
254 combinations of monoclonal antibodies has recently been achieved for treatment of Ebolavirus  
255 <sup>28</sup>, whereas other treatments, including convalescent plasma, did not show a benefit <sup>29</sup>.

256 In conclusion, our data show that prophylactic treatment with a highly neutralizing MAb not  
257 only protects against weight loss and reduces virus replication in the lungs, it also limits  
258 histopathological changes in the lungs. In addition, we show that while prophylactic treatment  
259 may prevent disease, animals still become infected and shed virus, indicating that transmission  
260 will not be blocked. These data highlight the importance to include virus shedding, replication  
261 in lungs as well as clinical and pathological determinants of disease in evaluating the efficacy of  
262 antibody treatment. In contrast, treatment with convalescent plasma provides only partial  
263 protection, and only when plasma with high neutralizing titers was used. This protective effect  
264 is completely annulled when using the median neutralizing antibody dose found in recovered  
265 patients <sup>7</sup>. It is therefore crucial to select convalescent plasma from donors with high levels of  
266 neutralizing antibody. Given the variation in antibody responses in patients, this limits the  
267 number of suitable donors for preparing immunoglobulin therapies considerably. No such

268 limitation is present with *in vitro* produced MAbs and our results suggest this may be the more  
269 favorable route to develop an effective therapy.

270

271 **LEGENDS**

272 **Fig.1 Effect of prophylactic neutralizing antibody treatment on weight loss and virus**

273 **replication following SARS-CoV-2 infection in hamsters.** A. Body weights of hamsters treated  
274 with antibodies were measured at indicated days after inoculation with SARS-CoV-2. SARS-CoV-  
275 2 viral RNA (B, C, E and G) or infectious virus (D, F and H) was detected in throat (B), nasal  
276 washes (C and D), lung (E and F) and nasal turbinates (G and H). The mean % of starting weight,  
277 the mean copy number or the mean infectious titer is shown, error bars represent the standard  
278 error of mean. n = 4. \* = P<0.01 and + = P<0.05, ANOVA compared to SARS-CoV-2 inoculated,  
279 untreated animals.

280

281 **Fig. 2 Gross pathological examination of the lungs of SARS-CoV-2 infected hamsters.** Foci

282 (arrowheads) of pulmonary consolidation in untreated SARS-CoV-2 infected animals (A) and  
283 animals treated with control MAb (D) or low dose plasma (F). Protection against pulmonary  
284 lesions in hamsters treated with MAb 47D11 (C) and high dose plasma (E), similar to mock  
285 infected animals (B). Images are from representative animals of each treatment group.

286

287 **Fig. 3 Histopathological changes and virus antigen expression in nasal turbinates of hamsters**

288 **after challenge with SARS-CoV-2.** In the nasal turbinate of a sham-inoculated hamster (left  
289 column), the nasal cavity is empty and the histology of the olfactory mucosa is normal (A). In a  
290 serial section, there is no SARS-CoV-2 antigen expression (C). In the nasal turbinate of a non-



291 treated SARS-CoV-2-inoculated hamster (B and D), the nasal cavity is filled with edema fluid  
292 mixed with inflammatory cells and debris and the olfactory mucosa is infiltrated by neutrophils  
293 (B). A serial section of this tissue shows SARS-CoV-2 antigen expression in many olfactory  
294 mucosal cells, as well as in cells in the lumen (C).

295

296 **Fig. 4 Effect of preventive treatment with MAb or high dose convalescent plasma on severity**  
297 **of pneumonia and level of virus antigen expression in lung parenchyma of hamsters after**  
298 **challenge with SARS-CoV-2.** Comparison of extent of histopathological changes (HE) and virus  
299 antigen expression (IHC) at four days after SARS-CoV-2 inoculation at low magnification (two  
300 left columns) and high magnification (two right columns) in hamsters treated 24 hours before  
301 virus inoculation with neutralizing antibodies (second, third and fourth rows) compared to no  
302 treatment before SARS-CoV-2 inoculation (first row) and sham inoculation (fifth row).

303

304 **Fig. 5 Quantitative assessment of histopathological changes and virus antigen expression.**  
305 Percentage of inflamed lung tissue (A) and percentage of lung tissue expressing SARS-CoV-2  
306 antigen (B) estimated by microscopic examination in different groups of hamsters at four days  
307 after SARS-CoV-2 inoculation. Individual (symbols) and mean (horizontal lines) percentages are  
308 shown. Error bars represent the standard error of mean. n = 4. \* = P<0.01 and + = P<0.05,  
309 ANOVA compared to SARS-CoV-2 inoculated, untreated animals.

310

311 **REFERENCES**

- 312 1. Chan, J.F., *et al.* A familial cluster of pneumonia associated with the 2019 novel coronavirus  
313 indicating person-to-person transmission: a study of a family cluster. *Lancet* **395**, 514-523  
314 (2020).
- 315 2. Huang, C., *et al.* Clinical features of patients infected with 2019 novel coronavirus in Wuhan,  
316 China. *Lancet* **395**, 497-506 (2020).
- 317 3. Yang, X., *et al.* Clinical course and outcomes of critically ill patients with SARS-CoV-2 pneumonia  
318 in Wuhan, China: a single-centered, retrospective, observational study. *Lancet Respir Med* **8**,  
319 475-481 (2020).
- 320 4. Joyner, M.J., *et al.* Early safety indicators of COVID-19 convalescent plasma in 5,000 patients. *J*  
321 *Clin Invest* (2020).
- 322 5. Devasenapathy, N., *et al.* Efficacy and safety of convalescent plasma for severe COVID-19 based  
323 on evidence in other severe respiratory viral infections: a systematic review and meta-analysis.  
324 *CMAJ* **192**, E745-E755 (2020).
- 325 6. Li, L., *et al.* Effect of Convalescent Plasma Therapy on Time to Clinical Improvement in Patients  
326 With Severe and Life-threatening COVID-19: A Randomized Clinical Trial. *JAMA* (2020).
- 327 7. Gharbharan, A., *et al.* Convalescent Plasma for COVID-19. A randomized clinical trial. (2020).
- 328 8. Kong, Y., *et al.* Successful treatment of a centenarian with coronavirus disease 2019 (COVID-19)  
329 using convalescent plasma. *Transfus Apher Sci*, 102820 (2020).
- 330 9. Shen, C., *et al.* Treatment of 5 Critically Ill Patients With COVID-19 With Convalescent Plasma.  
331 *JAMA* (2020).
- 332 10. Ye, M., *et al.* Treatment with convalescent plasma for COVID-19 patients in Wuhan, China. *J Med*  
333 *Virol* (2020).
- 334 11. Salazar, E., *et al.* Treatment of Coronavirus Disease 2019 (COVID-19) Patients with Convalescent  
335 Plasma. *Am J Pathol* (2020).
- 336 12. Imai, M., *et al.* Syrian hamsters as a small animal model for SARS-CoV-2 infection and  
337 countermeasure development. *Proc Natl Acad Sci U S A* **117**, 16587-16595 (2020).
- 338 13. Chan, J.F., *et al.* Simulation of the clinical and pathological manifestations of Coronavirus Disease  
339 2019 (COVID-19) in golden Syrian hamster model: implications for disease pathogenesis and  
340 transmissibility. *Clin Infect Dis* (2020).
- 341 14. Wang, C., *et al.* A human monoclonal antibody blocking SARS-CoV-2 infection. *Nat Commun* **11**,  
342 2251 (2020).
- 343 15. Sia, S.F., *et al.* Pathogenesis and transmission of SARS-CoV-2 in golden hamsters. *Nature* (2020).
- 344 16. Rogers, T.F., *et al.* Isolation of potent SARS-CoV-2 neutralizing antibodies and protection from  
345 disease in a small animal model. *Science* (2020).
- 346 17. Shi, R., *et al.* A human neutralizing antibody targets the receptor-binding site of SARS-CoV-2.  
347 *Nature* (2020).
- 348 18. Baum, A., *et al.* Antibody cocktail to SARS-CoV-2 spike protein prevents rapid mutational escape  
349 seen with individual antibodies. *Science* (2020).
- 350 19. Brouwer, P.J.M., *et al.* Potent neutralizing antibodies from COVID-19 patients define multiple  
351 targets of vulnerability. *Science* (2020).
- 352 20. Hansen, J., *et al.* Studies in humanized mice and convalescent humans yield a SARS-CoV-2  
353 antibody cocktail. *Science* (2020).
- 354 21. Wec, A.Z., *et al.* Broad neutralization of SARS-related viruses by human monoclonal antibodies.  
355 *Science* (2020).
- 356 22. Pinto, D., *et al.* Cross-neutralization of SARS-CoV-2 by a human monoclonal SARS-CoV antibody.  
357 *Nature* **583**, 290-295 (2020).

- 358 23. Okba, N.M.A., *et al.* Severe Acute Respiratory Syndrome Coronavirus 2-Specific Antibody  
359 Responses in Coronavirus Disease Patients. *Emerg Infect Dis* **26**, 1478-1488 (2020).
- 360 24. Ito, R., *et al.* Roles of anti-hemagglutinin IgA and IgG antibodies in different sites of the  
361 respiratory tract of vaccinated mice in preventing lethal influenza pneumonia. *Vaccine* **21**, 2362-  
362 2371 (2003).
- 363 25. Richard, M., *et al.* SARS-CoV-2 is transmitted via contact and via the air between ferrets. *Nat*  
364 *Commun* **11**, 3496 (2020).
- 365 26. Arvin, A.M., *et al.* A perspective on potential antibody-dependent enhancement of SARS-CoV-2.  
366 *Nature* (2020).
- 367 27. Liu, L., *et al.* Anti-spike IgG causes severe acute lung injury by skewing macrophage responses  
368 during acute SARS-CoV infection. *JCI Insight* **4**(2019).
- 369 28. Levine, M.M. Monoclonal Antibody Therapy for Ebola Virus Disease. *N Engl J Med* **381**, 2365-  
370 2366 (2019).
- 371 29. van Griensven, J., *et al.* Evaluation of Convalescent Plasma for Ebola Virus Disease in Guinea. *N*  
372 *Engl J Med* **374**, 33-42 (2016).
- 373 30. Rockx, B., *et al.* Comparative pathogenesis of COVID-19, MERS, and SARS in a nonhuman  
374 primate model. *Science* **368**, 1012-1015 (2020).
- 375 31. Corman, V.M., *et al.* Detection of 2019 novel coronavirus (2019-nCoV) by real-time RT-PCR. *Euro*  
376 *Surveill* **25**(2020).
- 377 32. Widjaja I, *et al.* Towards a solution to MERS: protective human monoclonal antibodies targeting  
378 different domains and functions of the MERS-coronavirus spike glycoprotein. *Emerg Microbes*  
379 *Infect.* **8**, 516-530 (2019).

380 **MATERIALS AND METHODS**

381 *Viruses and cells*

382 SARS-CoV-2 (isolate BetaCoV/Munich/BavPat1/2020) was obtained from a clinical case in  
383 Germany diagnosed after returning from China (European Virus Archive Global # 026V-03883).  
384 The virus was propagated to passage three on Vero E6 cells in Opti-MEM I (1X) + GlutaMAX  
385 (Gibco), supplemented with penicillin (10,000 IU/mL) and streptomycin (10,000 IU/mL) at 37°C  
386 in a humidified CO<sub>2</sub> incubator. All work was performed in a Class II Biosafety Cabinet under BSL-  
387 3 conditions at the Erasmus Medical Center (MC).

388

389 *MAbs and convalescent plasma*

390 We previously identified MAb 47D11 which efficiently neutralizes SARS-CoV-2 *in vitro*<sup>14</sup>. The  
391 irrelevant isotype control antibody used in this study was characterized previously<sup>32</sup>.  
392 Convalescent plasma was collected from donors who had a RT-PCR confirmed SARS-CoV-2  
393 infection and were asymptomatic for at least 14 days<sup>7</sup>. Of all donors tested, only plasma with  
394 neutralizing antibodies against SARS-CoV-2 confirmed by a SARS-CoV-2 plaque reduction  
395 neutralization test (PRNT) and a PRNT<sub>50</sub> titer of at least 1:1280 was used. Equal volumes of  
396 plasma from 6 donors was pooled and used for prophylactic treatment in hamsters (High dose).  
397 In addition, the pooled plasma was diluted 10-fold in PBS (Median dose). Normal human plasma  
398 from a healthy donor was used as a control.

399

400 *Animals and Ethical Statement*

401 Animals were handled in an ABSL3 biocontainment laboratory. Research was conducted in  
402 compliance with the Dutch legislation for the protection of animals used for scientific purposes  
403 (2014, implementing EU Directive 2010/63) and other relevant regulations. The licensed  
404 establishment where this research was conducted (Erasmus MC) has an approved OLAW  
405 Assurance # A5051-01. Research was conducted under a project license from the Dutch  
406 competent authority and the study protocol (#17-4312) was approved by the institutional  
407 Animal Welfare Body. Animals were housed in groups of 2 animals in filter top cages (T3,  
408 Techniplast), in Class III isolators allowing social interactions, under controlled conditions of  
409 humidity, temperature and light (12-hour light/12-hour dark cycles). Food and water were  
410 available ad libitum. Animals were cared for and monitored (pre- and post-infection) by  
411 qualified personnel. The animals were sedated/anesthetized for all invasive procedures.

412

413 *Animal procedures SARS-CoV-2*

414 Female Syrian golden hamsters (*Mesocricetus auratus*; 6-week-old hamsters from Janvier,  
415 France) were anesthetized by chamber induction (5 liters 100% O<sub>2</sub>/min and 3 to 5% isoflurane).  
416 24-hour prior to inoculation with virus, groups of 8 animals were treated with either 3mg of  
417 MAb in 1mL or 500 µl human convalescent plasma via the intraperitoneal route.

418 Animals were inoculated with 10<sup>5</sup> TCID<sub>50</sub> of SARS-CoV-2 or PBS (mock controls) in a 100 µl  
419 volume via the intranasal route. During the experiment the animals were monitored for general

420 health status and behavior daily and were weighed regularly for the duration of the study (up to  
421 22 days post inoculation; d.p.i.). Nasal washes, throat swabs and rectal swabs were collected  
422 under isoflurane anesthesia during the study. Groups of 4 animals were euthanized on day 4 or  
423 day 22 after inoculation, and serum samples, as well as lung, and nasal turbinates, were  
424 removed for virus detection and histopathology.

#### 425 *Serological Analysis*

426 To test for SARS-CoV-2 antibodies, hamster serum samples were collected at days 4 and 22.  
427 Serum samples were tested for SARS-CoV-2 antibodies using a spike S1 and nucleocapsid  
428 protein (N) ELISAs<sup>23</sup>. Briefly, ELISA plates were coated overnight with SARS-CoV-2 S1. After  
429 blocking, serum samples were added and incubated for 1h at 37°C. Bound antibodies were  
430 detected using HRP-labelled rabbit anti-human IgG (Dako) or anti-hamster IgG and TMB (Life  
431 Technologies) as a substrate. The absorbance of each sample was measured at 450 nm.  
432 A plaque reduction neutralization test (PRNT) was used as a reference for this study as  
433 previously described<sup>23</sup>. The serum neutralization titer is the reciprocal of the highest dilution  
434 resulting in an infection reduction of >50% (PRNT50).

435

#### 436 *Virus detection*

437 Samples from nasal turbinates and lungs were collected post mortem for virus detection by RT-  
438 qPCR and virus isolation as previously described<sup>30</sup>. Briefly, tissues were homogenized 10% w/v  
439 in viral transport medium using Polytron PT2100 tissue grinders (Kinematica). After low-speed

440 centrifugation, the homogenates were frozen at  $-70^{\circ}\text{C}$  until they were inoculated on Vero E6  
441 cell cultures in 10-fold serial dilutions. The SARS-CoV-2 RT-qPCR was performed and quantified  
442 as copy numbers as previously published <sup>31</sup>.

443

#### 444 *Histopathology and immunohistochemistry*

445 For histological examination lung and nasal turbinates were collected. Tissues for light-  
446 microscope examination were fixed in 10% neutral-buffered formalin, embedded in paraffin,  
447 and 3  $\mu\text{m}$  sections were stained with haematoxylin and eosin.

448 Sections of all tissue samples were examined for SARS-CoV-2 antigen expression by  
449 immunohistochemistry as previously described <sup>30</sup>. Briefly, paraffin was removed from sections,  
450 and viral antigen was detected using a rabbit polyclonal antibody against SARS-CoV-  
451 nucleoprotein (40143-T62, Sino Biological, Chesterbrook, PA, USA) and horseradish peroxidase  
452 labeled goat-anti-rabbit IgG (P0448, DAKO, Agilent Technologies Netherlands B.V. Amstelveen,  
453 The Netherlands). Horseradish peroxidase activity was revealed by incubating slides in 3-amino-  
454 9-ethylcarbazole (Sigma, St Louis, MO, USA) solution, resulting in a bright red precipitate.  
455 Sections were counterstained with haematoxylin.

456 For quantitative assessment of SARS-CoV-2 infection-associated inflammation in the lung, each  
457 H&E-stained section was examined for inflammation by light microscopy using a 2.5x objective,  
458 and the area of visibly inflamed tissue as a percentage of the total area of the lung section was  
459 estimated. Quantitative assessment of virus antigen expression in the lung was performed

460 according to the same method, but using lung sections stained by immunohistochemistry for  
461 SARS-CoV-2 antigen. Sections were examined without knowledge of the identity of the  
462 hamsters.

463

464 *Statistical analysis.*

465 Statistical analyses were performed using GraphPad Prism 5 software (La Jolla, CA, USA). Each  
466 specific test is indicated in the figure legends. P values of  $\leq 0.05$  were considered significant. All  
467 data are presented as means  $\pm$  standard error of the mean (SEM).



468 **ACKNOWLEDGEMENTS**

469 We thank J.M. Fentener van Vlissingen, Y. Kap, D. Akkermans, V. Vaes, for assistance with the  
470 animal studies. This research is (partly) financed by the NWO Stevin Prize awarded to M.K. by  
471 the Netherlands Organisation for Scientific Research (NWO), H2020 grant agreement 874735-  
472 VEO to M.K., the Netherlands Organisation for Health Research and Development (ZONMW)  
473 grant agreement 10150062010008 to B.H. and H2020 grant agreement 101003651–MANCO to  
474 B.H. The research was co-funded by the PPP Allowance (grant agreement LSHM19136) made  
475 available by Health Holland, Top Sector Life Sciences & Health, to stimulate public-private  
476 partnerships.

477

478 **AUTHOR CONTRIBUTIONS**

479 Conceptualization, B.R., M.K., B.H.; investigation, B.R., D.N., N.O., W.L., C.W., T.B., R.d.V., S.H.,  
480 D.d.M., P.v.R., M.L. ; resources, B.H., B.R., C.R., F.v.K., F.G., D.D., C.G.v.K., B.B.; supervision, B.R.  
481 and B.H.; writing, original draft, B.R., T.K., and B.H.; writing–review and editing, all authors;  
482 funding acquisition: B.H., F.G., B.B., and M.K.

483

484 **COMPETING INTEREST**

485 A patent application has been filed for antibody 47D11 targeting SARS-CoV-2 (United Kingdom  
486 patent application no. 2003632.3; patent applicants: Utrecht University, Erasmus Medical  
487 Center and Harbour BioMed). Others declare no competing interests.

**A**

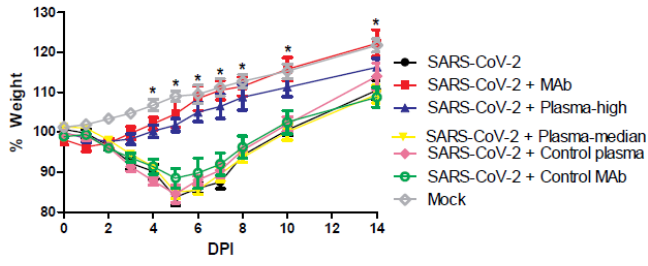

**B**

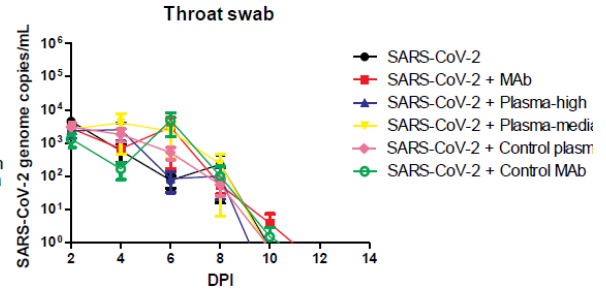

**C**

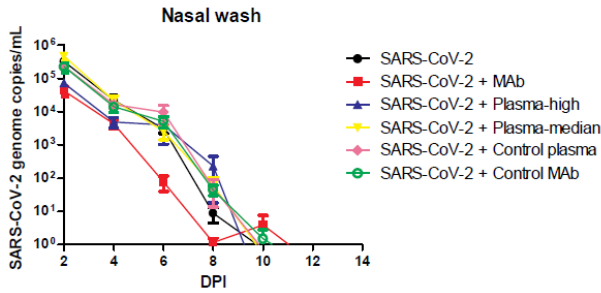

**D**

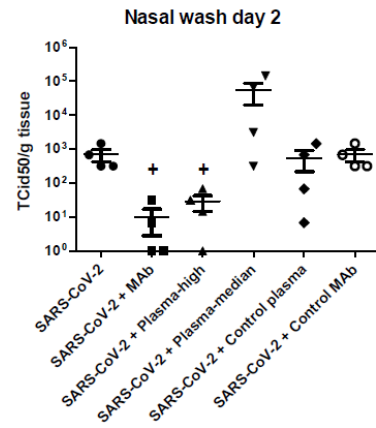

**E**

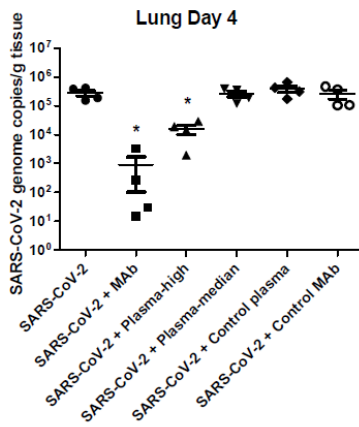

**F**

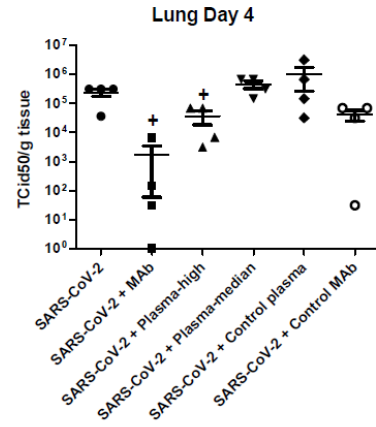

**G**

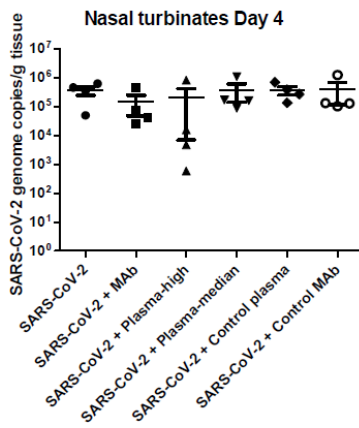

**H**

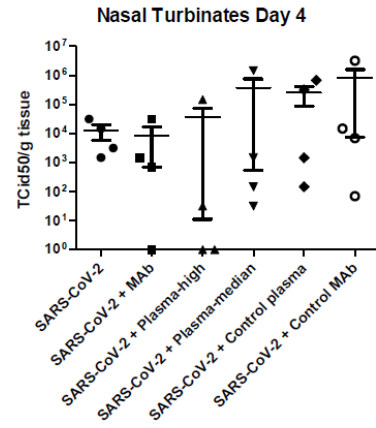

489 Fig.1 Effect of prophylactic neutralizing antibody treatment on weight loss and virus replication  
490 following SARS-CoV-2 infection in hamsters. A. Body weights of hamsters treated with  
491 antibodies were measured at indicated days after inoculation with SARS-CoV-2. SARS-CoV-2  
492 viral RNA (B, C, E and G) or infectious virus (D, F and H) was detected in throat (B), nasal washes  
493 (C and D), lung (E and F) and nasal turbinates (G and H). The mean % of starting weight, the  
494 mean copy number or the mean infectious titer is shown, error bars represent the standard  
495 error of mean. n = 4. \* = P<0.01 and + = P<0.05, ANOVA compared to SARS-CoV-2 inoculated,  
496 untreated animals.

497

498

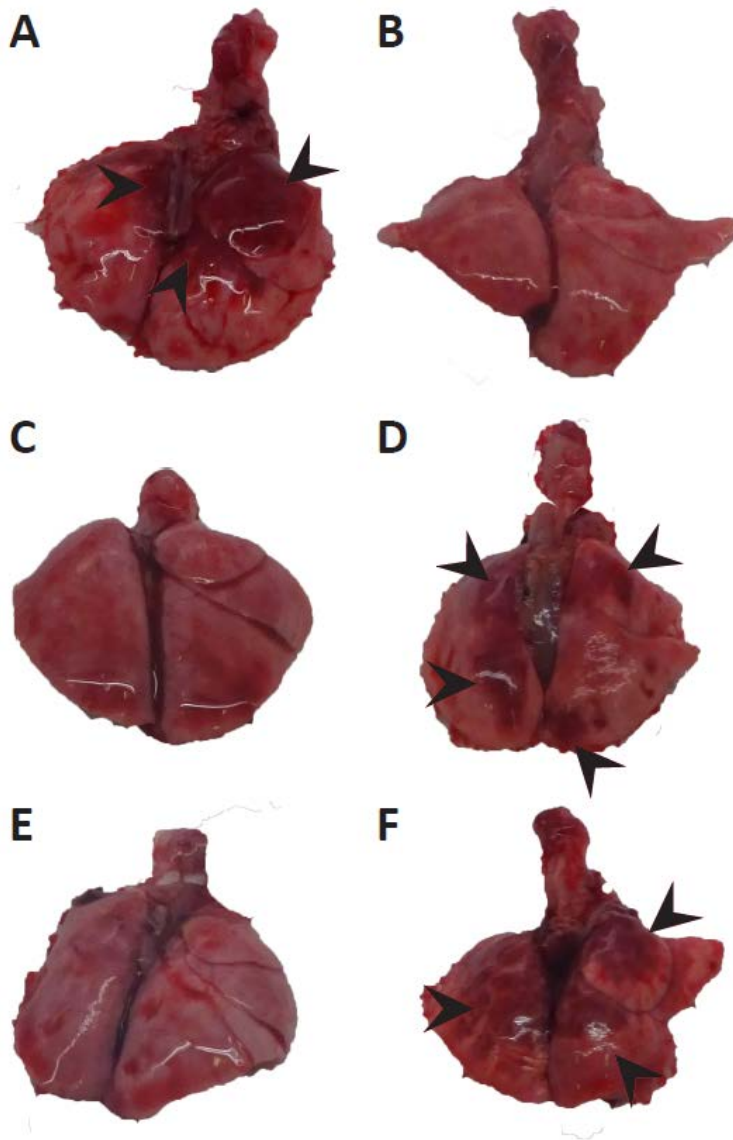

499

500 Fig. 2 Gross pathological examination of the lungs of SARS-CoV-2 infected hamsters. Foci  
501 (arrowheads) of pulmonary consolidation in untreated SARS-CoV-2 infected animals (A) and  
502 animals treated with control MAb (D) or low dose plasma (F). Protection against pulmonary  
503 lesions in hamsters treated with MAb 47D11 (C) and high dose plasma (E), similar to mock  
504 infected animals (B). Images are from representative animals of each treatment group.

505

506

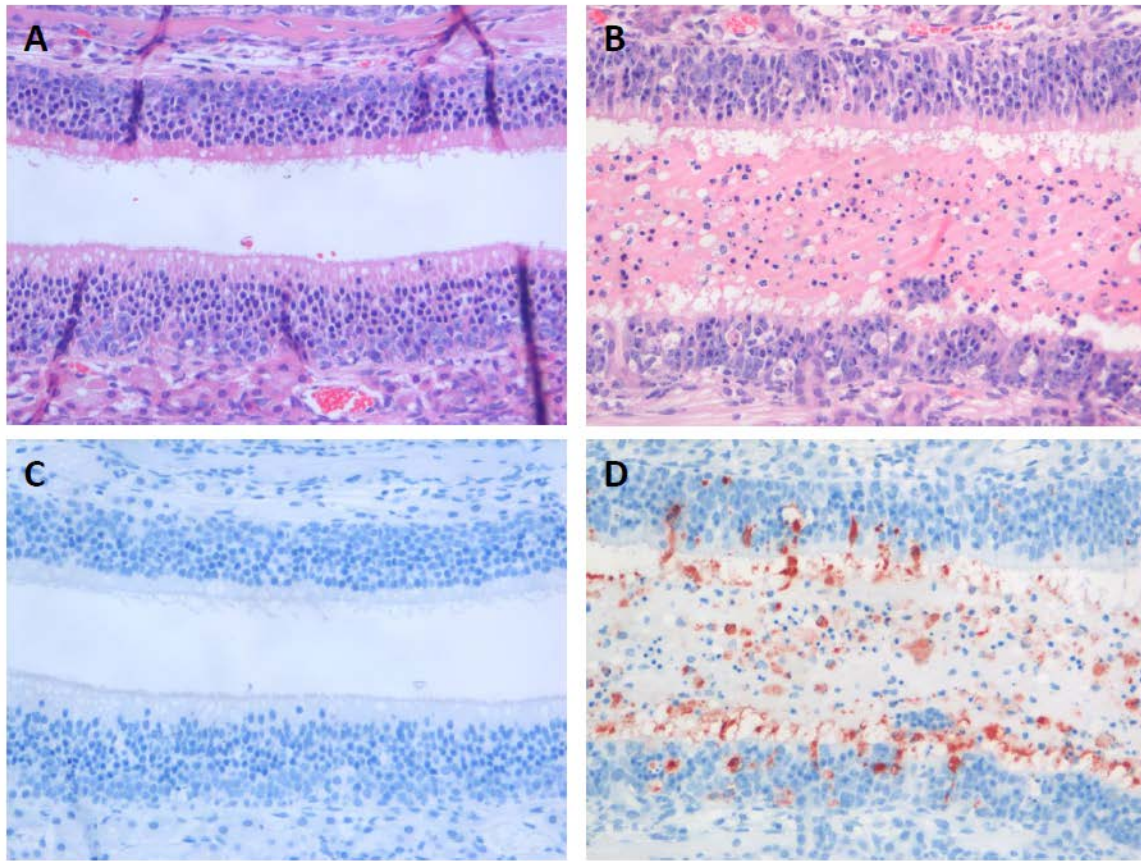

507

508 Fig. 3 Histopathological changes and virus antigen expression in nasal turbinates of hamsters  
509 after challenge with SARS-CoV-2. In the nasal turbinate of a sham-inoculated hamster (left  
510 column), the nasal cavity is empty and the histology of the olfactory mucosa is normal (A). In a  
511 serial section, there is no SARS-CoV-2 antigen expression (C). In the nasal turbinate of a non-  
512 treated SARS-CoV-2-inoculated hamster (B and D), the nasal cavity is filled with edema fluid  
513 mixed with inflammatory cells and debris and the olfactory mucosa is infiltrated by neutrophils  
514 (B). A serial section of this tissue shows SARS-CoV-2 antigen expression in many olfactory  
515 mucosal cells, as well as in cells in the lumen (C).

516

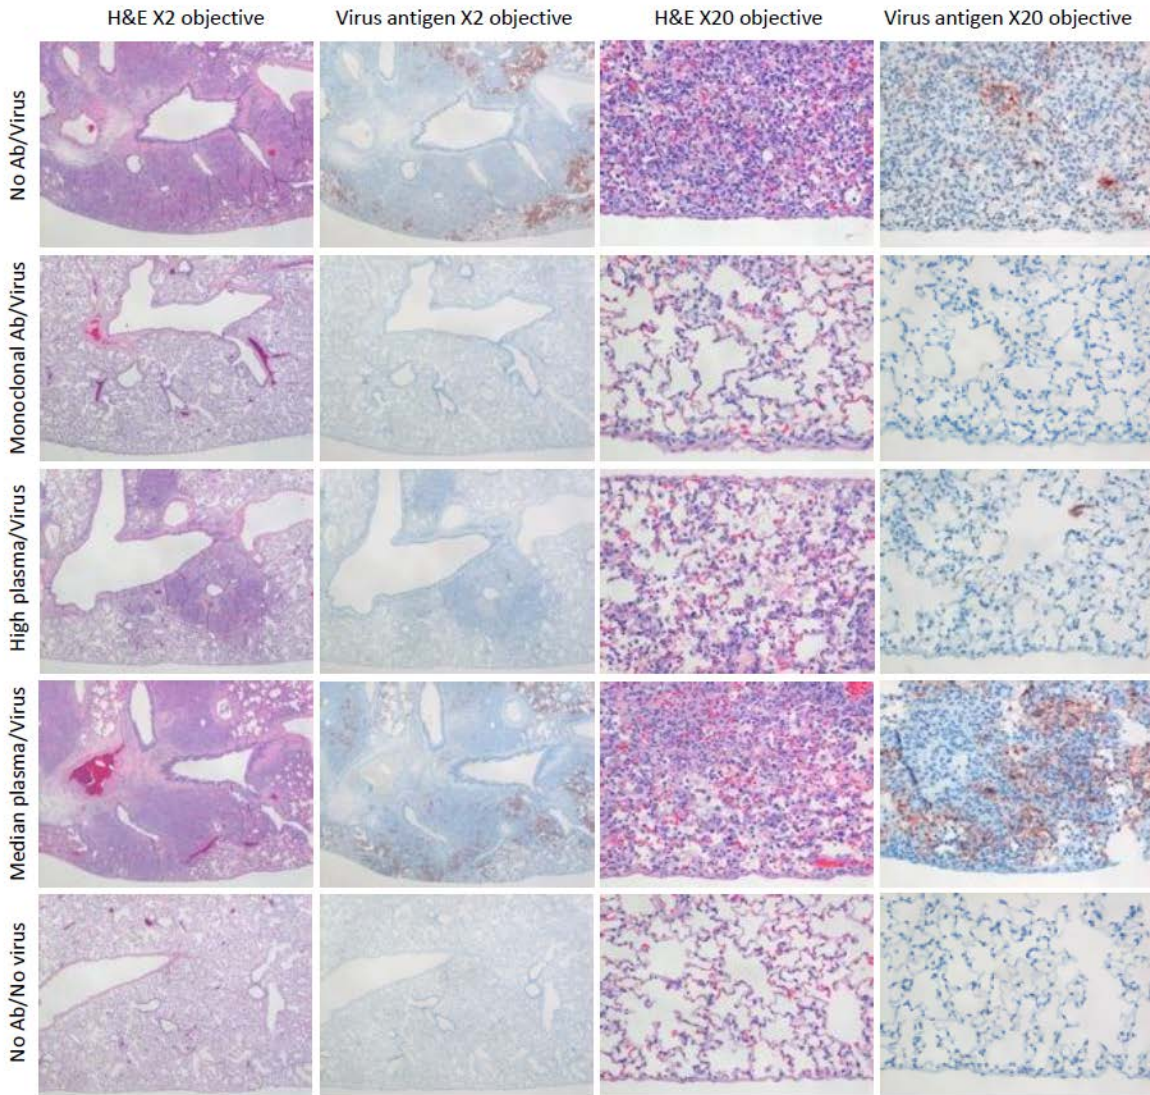

517

518 Fig. 4 Effect of preventive treatment with MAb or high dose convalescent plasma on severity of  
519 pneumonia and level of virus antigen expression in lung parenchyma of hamsters after  
520 challenge with SARS-CoV-2. Comparison of extent of histopathological changes (HE) and virus  
521 antigen expression (IHC) at four days after SARS-CoV-2 inoculation at low magnification (two  
522 left columns) and high magnification (two right columns) in hamsters treated 24 hours before  
523 virus inoculation with neutralizing antibodies (second, third and fourth rows) compared to no  
524 treatment before SARS-CoV-2 inoculation (first row) and sham inoculation (fifth row).

525

526

527

528

529

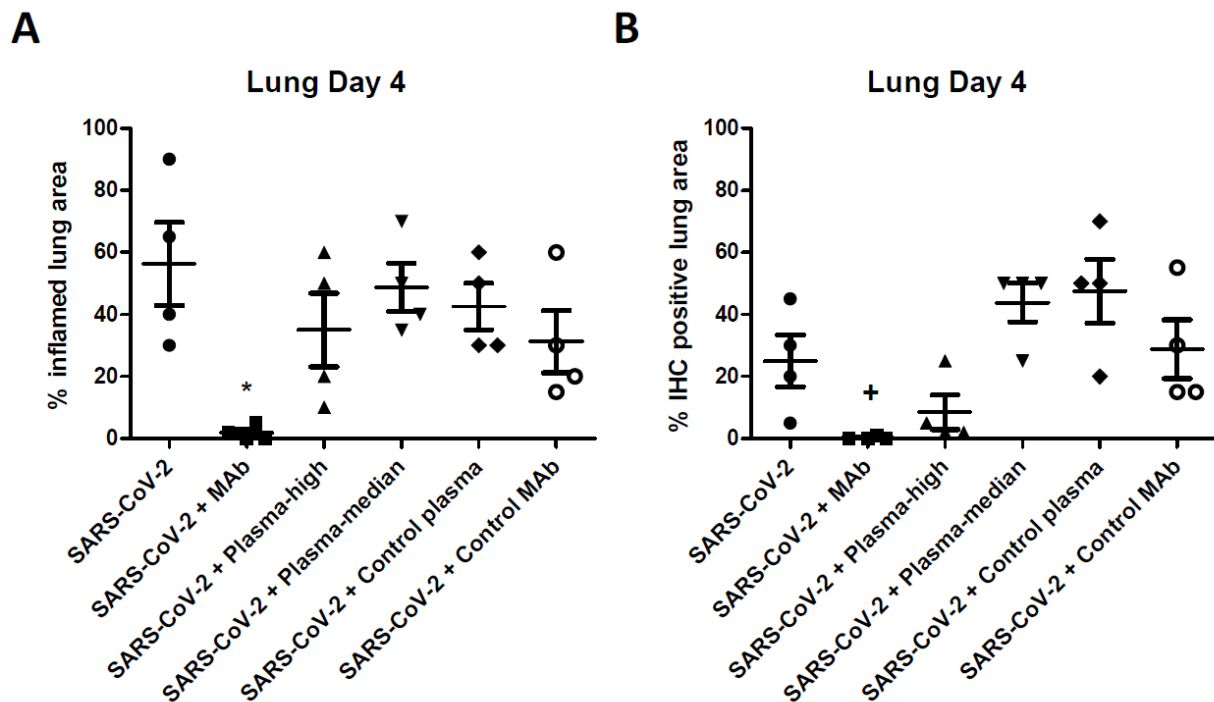

530

531 Fig. 5 Quantitative assessment of histopathological changes and virus antigen expression.  
532 Percentage of inflamed lung tissue (A) and percentage of lung tissue expressing SARS-CoV-2  
533 antigen (B) estimated by microscopic examination in different groups of hamsters at four days  
534 after SARS-CoV-2 inoculation. Individual (symbols) and mean (horizontal lines) percentages are  
535 shown. Error bars represent the standard error of mean. n = 4. \* = P<0.01 and + = P<0.05,  
536 ANOVA compared to SARS-CoV-2 inoculated, untreated animals.

537

538

539
